# Supplementary material for: Hollow CoP/FeP4 Heterostructural Nanorods Interwoven by CNT as a Highly Efficient Electrocatalyst for Oxygen Evolution Reactions
Source: MDPI journal article supplement (doi:10.3390/nano11061450), 2021-05-30

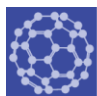

## Supplementary Materials

# Hollow CoP/FeP<sub>4</sub> Heterostructural Nanorods Interwoven by CNT as a Highly Efficient Electrocatalyst for Oxygen Evolution Reactions

Yanfang Liu <sup>1,2,†</sup>, Yong Li <sup>1,†</sup>, Qi Wu <sup>1</sup>, Zhe Su <sup>2</sup>, Bin Wang <sup>2,\*</sup>, Yuanfu Chen <sup>1,2,\*</sup> and Shifeng Wang <sup>1,3,\*</sup>

<sup>1</sup> College of Science, Institute of Oxygen Supply, Tibet University, Lhasa 850000, China;

liuyanfang@utibet.edu.cn (Y.L.); xzuliyong@utibet.edu.cn (Y.L.); wuqi\_zangda@163.com (Q.W.)

<sup>2</sup> School of Electronic Science and Engineering, and State Key Laboratory of Electronic Thin Films and Integrated Devices, University of Electronic Science and Technology of China, Chengdu 610054, China; su\_zhe0412@hotmail.com (Z.S.)

<sup>3</sup> Key Laboratory of Cosmic Rays, Tibet University, Ministry of Education, Lhasa 850000, China

\* Correspondence: wangbin403403@126.com (B.W.); yfchen@uestc.edu.cn (Y.C.); wsf@utibet.edu.cn (S.W.)

† These authors contribute equally to this work.

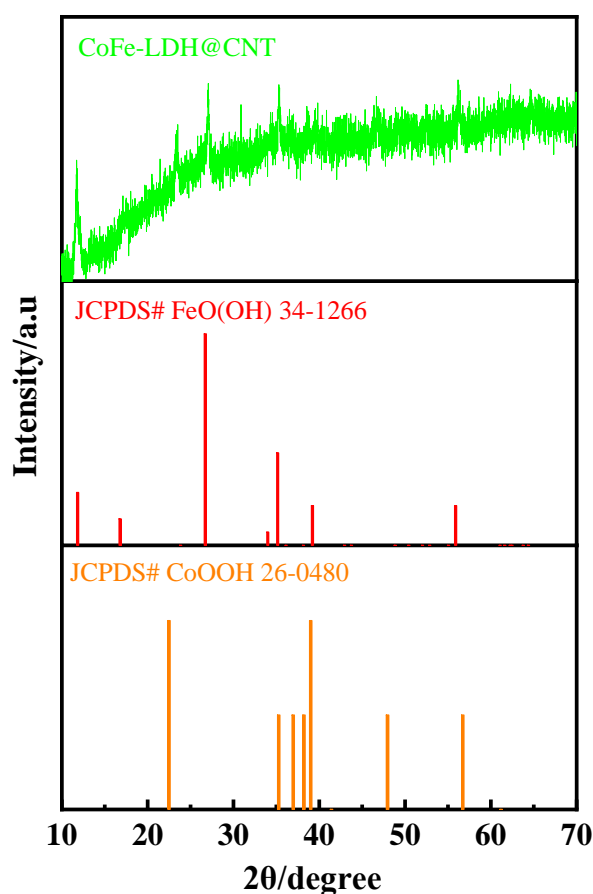

Figure S1. XRD pattern of the CoFe-LDH@CNT precursor.

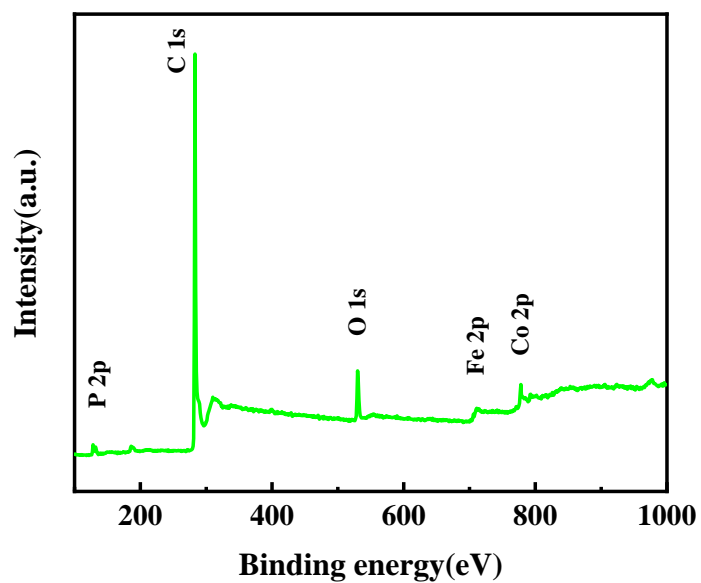

**Figure S2.** The XPS survey spectrum of CoP/FeP<sub>4</sub>@CNT.

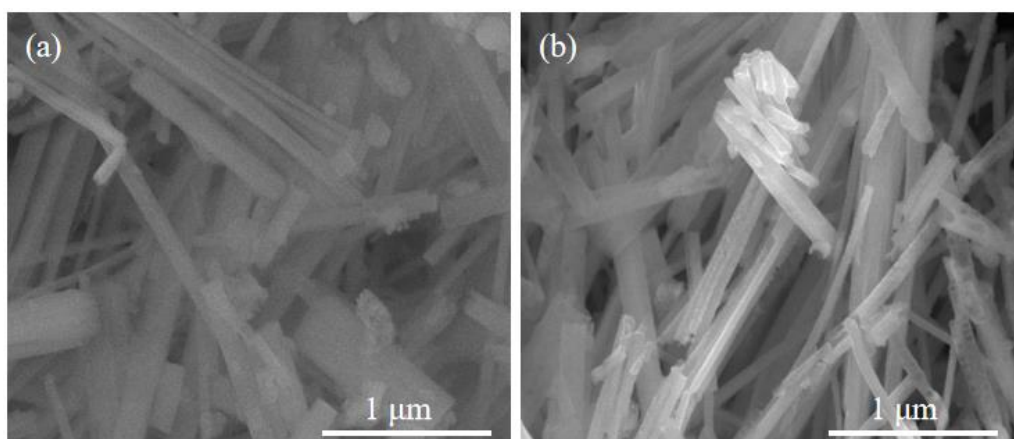

**Figure S3.** SEM morphology images of (a) CoFe-LDH, (b) CoFeP.

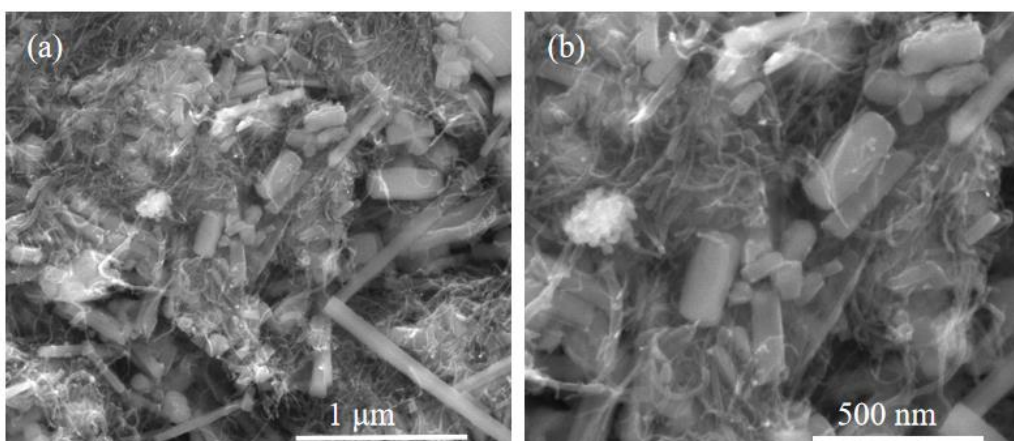

**Figure S4.** (a,b)SEM images of CoFe-LDH@CNT from different magnifications.

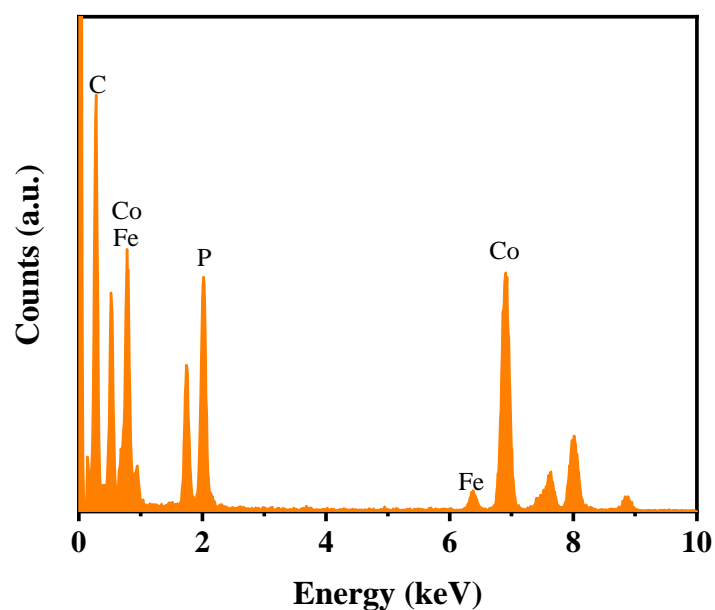

Figure S5. EDX spectrum of CoP/FeP<sub>4</sub>@CNT.

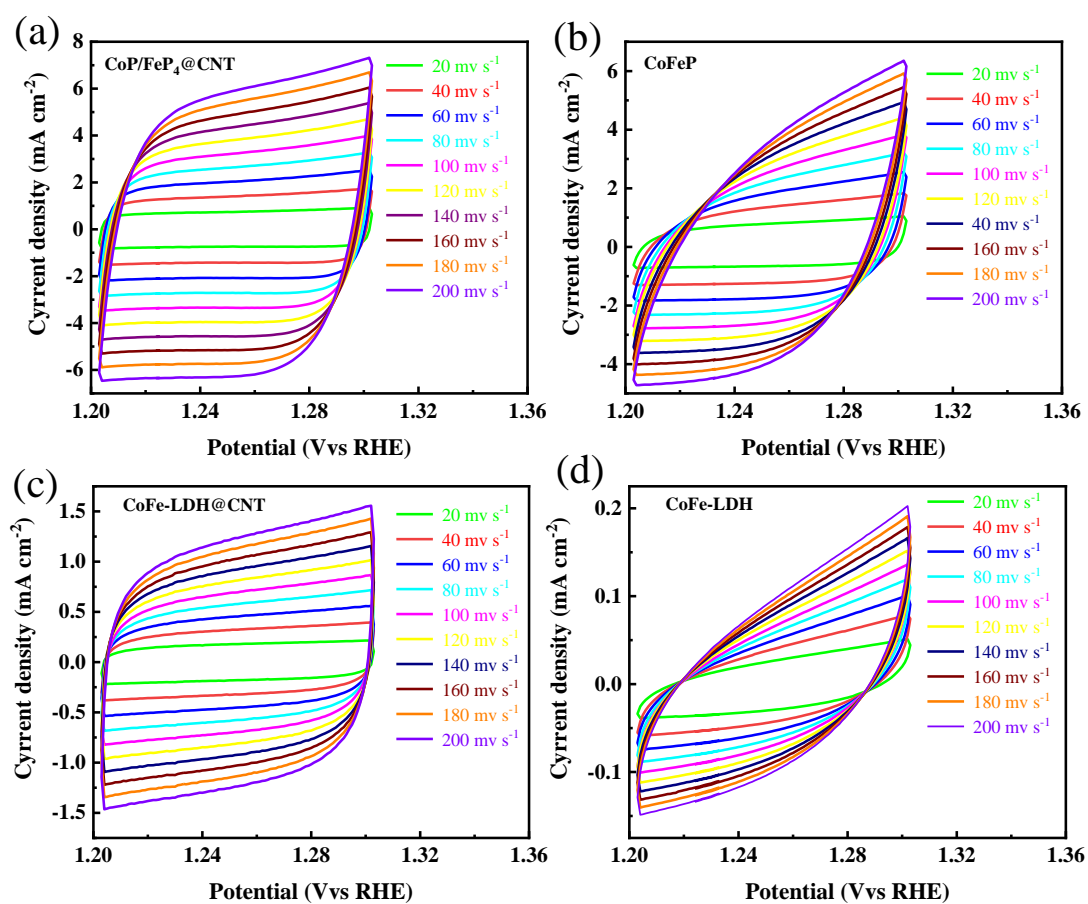

Figure S6. (a–d) Voltammograms for the OER in an alkaline electrolyte.

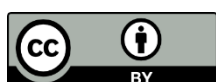

Supplement: s1 [file s1]
